# Supplementary material for: Interaction of a Biologically Active Zn²⁺ Complex with Human Serum Albumin: Experimental and Theoretical Insights
Source: Research Square preprint supplement (doi:10.21203/rs.3.rs-7968849/v1), 2025-11-17
Supplement: Supplementary file 1 [file c184fdc7813957588d2cb410.docx]

**Supplementary Information**

**Interaction of a Biologically Active Zn²⁺ Complex with Human Serum Albumin: Experimental and Theoretical Insights**

**Suparna Rudra Haria, Subrata Ghoshb and Harasit Kumar Mandalc***

aAssistant Professor in Chemistry, Department of Chemistry, Brainware University, West Bengal 700125, India

bDepartment of Central Scientific Services, Indian Association for the Cultivation of Science, West Bengal 700030, India

cAssistant Professor in Chemistry, Department of Chemistry, Sree Chaitanya College, Habra, West Bengal 743268, India

*Corresponding author, *e-mail*: [harasitju@gmail.com](mailto:harasitju@gmail.com)

**1. Fluorescence Quenching and Binding Mechanism**


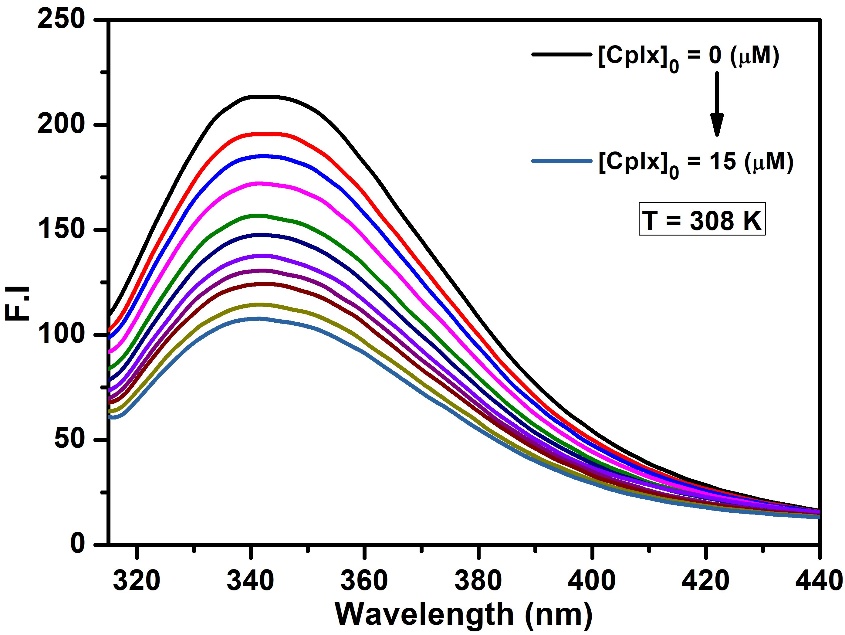

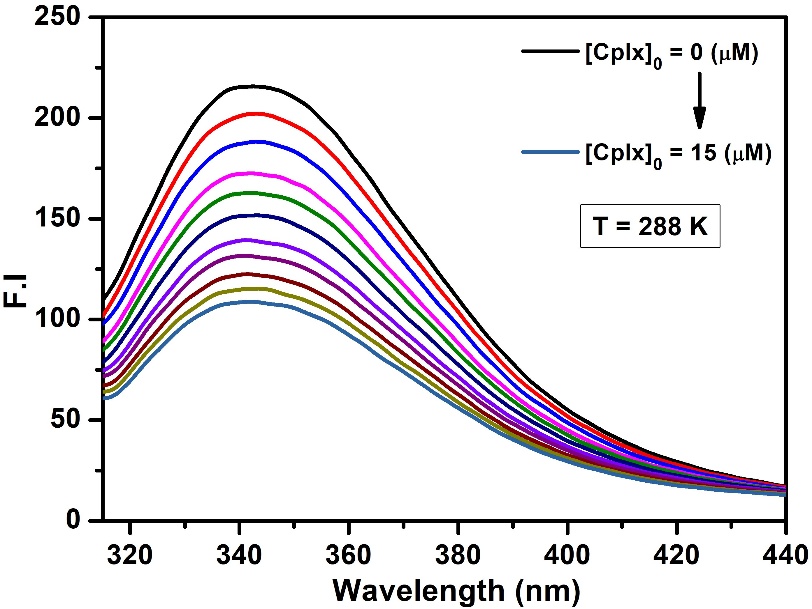


**Fig.** **S1.** Quenching of fluorescence intensity (F.I) of HSA protein due to interaction with synthesized metal complex, [HSA]0 =5 *µ*M, [complex]0 = 0 to 15 *µ*M, pH =7.4, at 288 K and at 308 K respectively.

**Table S1:** Fluorescence intensity (F.I) of HSA protein due to interaction with metal complex at different temperatures. [HSA]0 =5 *µ*M, [complex]0 = 0 to 15 *µ*M, pH =7.4

| [Complex]0  (*µ*M) | 298 K | | 308 K | | 318 K | |
| --- | --- | --- | --- | --- | --- | --- |
| F | F0/F | F | F0/F | F | F0/F |
| 0 | 243.25 | 1.00 | 215.8 | 1.00 | 213.01 | 1.00 |
| 1.5 | 210.31 | 1.1566 | 193.57 | 1.11482 | 198.64 | 1.07235 |
| 3.0 | 190.92 | 1.27408 | 177.84 | 1.21345 | 186.84 | 1.14008 |
| 4.5 | 174.80 | 1.39156 | 164.47 | 1.31209 | 176.36 | 1.20781 |
| 6.0 | 161.19 | 1.50905 | 152.97 | 1.41073 | 166.99 | 1.27553 |
| 7.5 | 149.55 | 1.62653 | 142.97 | 1.50937 | 158.58 | 1.34326 |
| 9.0 | 139.48 | 1.74401 | 134.18 | 1.60831 | 150.96 | 1.41099 |
| 10.5 | 131.50 | 1.84974 | 127.18 | 1.69678 | 144.71 | 1.47194 |
| 12.0 | 122.92 | 1.97897 | 119.54 | 1.80528 | 137.74 | 1.54644 |
| 13.5 | 116.68 | 2.08471 | 113.94 | 1.89405 | 132.52 | 1.60741 |
| 15.0 | 110.46 | 2.20219 | 108.29 | 1.99269 | 127.16 | 1.67512 |


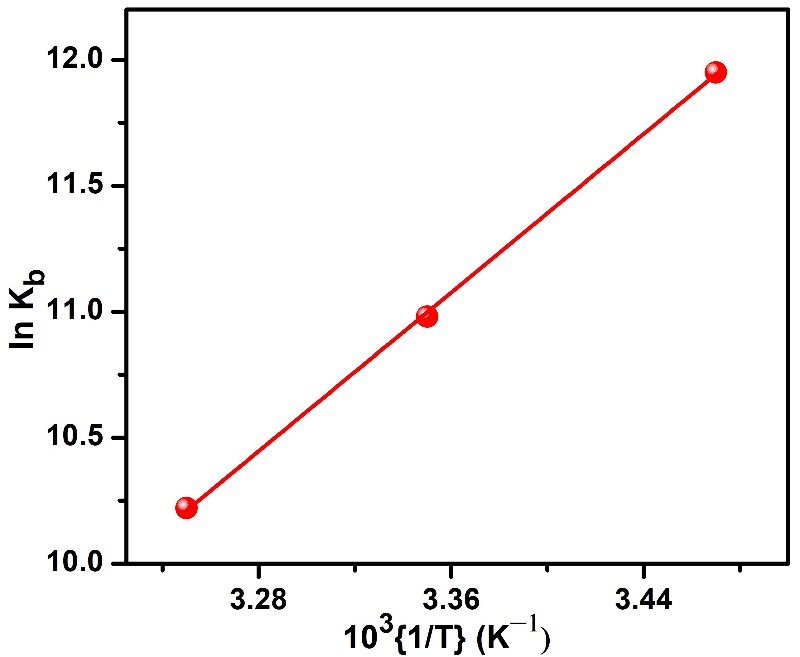


**Fig. S2.** The linear plot of ln Kb versus 1/T demonstrates that the binding constant diminishes as the temperature increases.

**2. Stoichiometry of protein-ligand complex**

Spectral data obtained from the emission titration experiments were used to determine the stoichiometry of the ligand–protein complex using the Benesi–Hildebrand equation [Eq. 1] [1].

(1)

Where, *F1* is the emission intensity of HSA at infinite concentration of cplx, K is the binding constant and Q is the quencher (cplx). The plot of 1/[F₀ − F] versus 1/[Q] exhibited excellent linearity (Fig. S3), indicating a 1:1 interaction between the complex and HSA. However, to further confirm this stoichiometry and eliminate the possibility of 1:2 complex formation, a modified Benesi–Hildebrand equation was also employed. The inset plot of Fig. S3, presenting 1/(F₀ − F) versus 1/[Q]², shows a clear deviation from linearity, confirming the absence of any 1:2 complex formation [2].


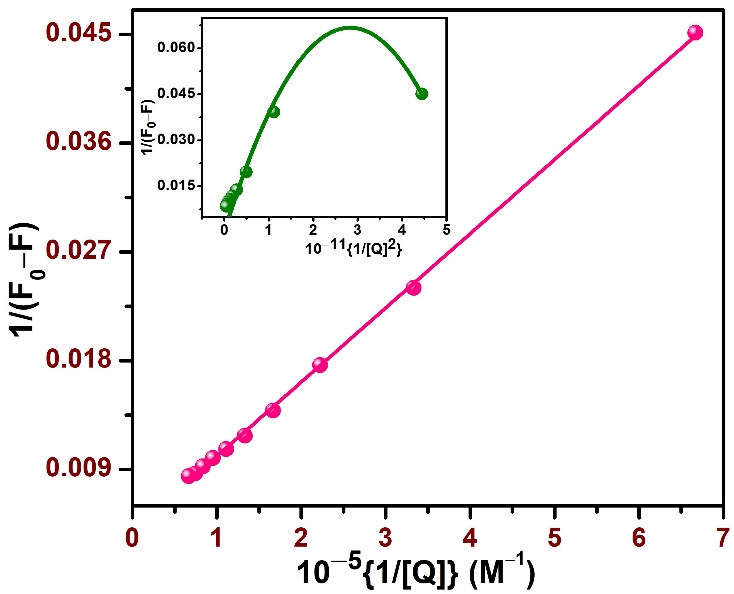


**Fig. S3.** Benesi–Hildebrand plot of 1/[F₀ − F] versus 1/[Q] for the binding of the complex with HSA. The inset displays the modified Benesi–Hildebrand plot of 1/[F₀ − F] versus 1/[Q]² for the HSA–complex system.

**References:**

1. Benesi HA., Hildebrand JH (1949) A spectrophotometric investigation of the interaction of iodine with aromatic hydrocarbons. *Journal of American Chemical Society* **71**, 2703–2707. <https://doi.org/10.1021/ja01176a030>

2. Shanmugaraj K, Anandakumar S, Ilanchelian M (2014) Exploring the biophysical aspects and binding mechanism of thionine with bovine hemoglobin by optical spectroscopic and molecular docking methods. [*Journal of Photochemistry and Photobiology B: Biology*](https://www.sciencedirect.com/journal/journal-of-photochemistry-and-photobiology-b-biology)**131**, 43–52. <https://doi.org/10.1016/j.jphotobiol.2014.01.001>
